# Supplementary material
Source: publisher figshare collection journal article supplement (https://future-science-group.figshare.com/articles/dataset/_/21435735)
Supplement: Supplementary file 1 [file 1]

| **Primers** | **Sequence** | | |
| --- | --- | --- | --- |
| GAPDH_F | TCAAGGCTGAGAACGGGAAG | | |
| GAPDH _R | GGACTCCACGACGTACTCAG | | |
| ANGPTL4_F | GATGGCTCAGTGGACTTCAACC | | |
| ANGPTL4_R | TGCTATGCACCTTCTCCAGACC | | |
| POSTN_F | CAGCAAACCACCTTCACGGATC | | |
| POSTN_R | TTAAGGAGGCGCTGAACCATGC | | |
| DIO3_F | GCCTACTTCGAGCGTCTCTATG | | |
| DIO3_R | CATAGCGTTCCAACCAAGTGCG | | |
| IGFBP3_F | CGCTACAAAGTTGACTACGAGTC | | |
| IGFBP3_R | GTCTTCCATTTCTCTACGGCAGG | | |
| TNFSF10_F | TGGCAACTCCGTCAGCTCGTTA | | |
| TNFSF10_R | AGCTGCTACTCTCTGAGGACCT | | |
| ADM2_F | GGATGGTGGCCGCCAACACTC | | |
| ADM2_R | ACAGGCGGTGGCTGAGATTCTG | | |
| VEGFA_F | TTGCCTTGCTGCTCTACCTCCA | | |
| VEGFA_R | GATGGCAGTAGCTGCGCTGATA | | |
| VLDLR_F | CAAGGATGGCAGTGATGAGGTC | | |
| VLDLR_R | CTCGGATACCATTACACTGCCTG | | |
| SERPINB4_F | GGAGCCAAAGACAACACTGCAC | | |
| SERPINB4_R | CTGGTGATGAACATTTCCTGACC | | |
| HPGD_F | TGGAGGTGAAGGCGGCATCATT | | |
| HPGD_R | GAGCGTGTGAATCCAACTATGCC | | |
| DDIT4_F | GTTTGACCGCTCCACGAGCCT | | |
| DDIT4_R | GCACACAAGTGTTCATCCTCAGG | | |
| **Antibody/ Reagent** | | **Manufacturer** | **Catalog number** |
| GAPDH | | Proteintech | 60004-I-Ig |
| METTL14 | | Proteintech | 26158-I-AP |
| METTL3 | | Proteintech | 15073-I-AP |
| ALKBH5 | | Sigma | HPA007196-100UL |
| FTO | | Abcam | ab92821 |
| ICAM-1 | | Invitrogen | MA5407 |
| VCAM-1 | | Invitrogen | MA516429 |
| VCAM-1 | | Invitrogen | MA516429 |
| Dil acetylated LDL | | Invitrogen | L3484 |
| Ki67 | | Invitrogen | PA519462 |
| Alexa Fluor 488 | | Invitrogen | A21206 |
| Alexa Fluor 594 | | Invitrogen | A21203 |
| m6A | | Millipore | ABE 572 |
